# Supplementary material
Source: HighWire-hosted journal article supplement (https://www.cmaj.ca/content/suppl/2013/02/19/cmaj.121349)
Supplement: physical-payne-1-at.pdf [file physical-payne-1-at.pdf]

**Appendix 1 (as supplied by the authors): List of physical and mental health conditions**  
 List of physical and mental health conditions<sup>1</sup>

| Physical conditions                                                                                 | Mental health conditions                                              |
|-----------------------------------------------------------------------------------------------------|-----------------------------------------------------------------------|
| Hypertension                                                                                        | Depression                                                            |
| Painful condition                                                                                   | Anxiety & other neurotic, stress related & somatoform disorders       |
| Asthma (currently treated)                                                                          | Alcohol problems                                                      |
| Coronary heart disease                                                                              | Other psychoactive substance misuse                                   |
| Treated dyspepsia                                                                                   | Dementia                                                              |
| Diabetes                                                                                            | Schizophrenia (and related non-organic psychosis) or bipolar disorder |
| Thyroid disorders                                                                                   | Learning disability                                                   |
| Rheumatoid arthritis, other inflammatory polyarthropathies & systematic connective tissue disorders | Anorexia or bulimia                                                   |
| Hearing loss                                                                                        |                                                                       |
| Chronic obstructive pulmonary disease                                                               |                                                                       |
| Irritable bowel syndrome                                                                            |                                                                       |
| New diagnosis of cancer within last 5 years                                                         |                                                                       |
| Treated constipation                                                                                |                                                                       |
| Stroke & transient ischaemic attack                                                                 |                                                                       |
| Chronic kidney disease                                                                              |                                                                       |
| Diverticular disease of intestine                                                                   |                                                                       |
| Atrial fibrillation                                                                                 |                                                                       |
| Peripheral vascular disease                                                                         |                                                                       |
| Heart failure                                                                                       |                                                                       |
| Prostate disorders                                                                                  |                                                                       |
| Glaucoma                                                                                            |                                                                       |
| Epilepsy (currently treated)                                                                        |                                                                       |
| Psoriasis or eczema                                                                                 |                                                                       |
| Inflammatory bowel disease                                                                          |                                                                       |
| Migraine                                                                                            |                                                                       |
| Blindness & low vision                                                                              |                                                                       |
| Chronic sinusitis                                                                                   |                                                                       |
| Bronchiectasis                                                                                      |                                                                       |
| Parkinson's disease                                                                                 |                                                                       |
| Multiple sclerosis                                                                                  |                                                                       |
| Viral hepatitis                                                                                     |                                                                       |
| Chronic liver disease                                                                               |                                                                       |

Reference

1. Barnett K, Mercer SW, Norbury M, Watt GC, Wyke S, Guthrie B. The epidemiology of multimorbidity in a large cross-sectional dataset: implications for healthcare, research and medical education. *Lancet* 2012; **380**:37-43.
