# Supplementary material
Source: HighWire-hosted journal article supplement (https://www.cmaj.ca/content/suppl/2013/02/19/cmaj.121349)
Supplement: physical-payne-4-at.pdf [file physical-payne-4-at.pdf]

**Appendix 4 (as supplied by the authors): Number of physical conditions by gender, age and deprivation**

|                             | All patients | Number of physical conditions |                |                |               |                |
|-----------------------------|--------------|-------------------------------|----------------|----------------|---------------|----------------|
|                             |              | 0                             | 1              | 2              | 3             | ≥4             |
| Total patients, N (100%)    | 180,815      | 83,045 (45.9%)                | 42,825 (23.7%) | 23,344 (12.9%) | 13,743 (7.6%) | 17,858 (9.9%)  |
| Gender, N (%)               |              |                               |                |                |               |                |
| Male                        | 89,076       | 45,522 (51.1%)                | 19,637 (22.0%) | 10,185 (11.4%) | 5,931 (6.7%)  | 7,801 (8.8%)   |
| Female                      | 91,739       | 37,523 (40.9%)                | 23,188 (25.3%) | 13,159 (14.3%) | 7,812 (8.5%)  | 10,057 (11.0%) |
| Age (years)                 |              |                               |                |                |               |                |
| 20-34                       | 38,500       | 28,376 (73.7%)                | 7,864 (20.4%)  | 1,764 (4.6%)   | 390 (1.0%)    | 106 (0.3%)     |
| 35-44                       | 35,934       | 22,936 (63.8%)                | 8,950 (24.9%)  | 2,800 (7.8%)   | 873 (2.4%)    | 375 (1.0%)     |
| 45-54                       | 34,227       | 17,007 (49.7%)                | 9,692 (28.3%)  | 4,548 (13.3%)  | 1,858 (5.4%)  | 1,122 (3.3%)   |
| 55-64                       | 30,827       | 9,803 (31.8%)                 | 8,790 (28.5%)  | 5,993 (19.4%)  | 3,283 (10.6%) | 2,958 (9.6%)   |
| 65-74                       | 22,053       | 3,554 (16.1%)                 | 4,956 (22.5%)  | 4,759 (21.6%)  | 3,679 (16.7%) | 5,105 (23.1%)  |
| 75+                         | 19,274       | 1,369 (7.1%)                  | 2,573 (13.3%)  | 3,480 (18.1%)  | 3,660 (19.0%) | 8,192 (42.5%)  |
| Deprivation quintile, N (%) |              |                               |                |                |               |                |
| 1, least deprived           | 31,121       | 15,507 (49.8%)                | 7,601 (24.4%)  | 3,765 (12.1%)  | 1,984 (6.4%)  | 2,264 (7.3%)   |
| 2                           | 37,261       | 17,322 (46.5%)                | 8,976 (24.1%)  | 4,792 (12.9%)  | 2,714 (7.3%)  | 3,457 (9.3%)   |
| 3                           | 45,823       | 20,397 (44.5%)                | 10,919 (23.8%) | 6,153 (13.4%)  | 3,634 (7.9%)  | 4,720 (10.3%)  |
| 4                           | 36,098       | 16,108 (44.6%)                | 8,328 (23.1%)  | 4,753 (13.2%)  | 2,954 (8.2%)  | 3,955 (11.0%)  |
| 5, most deprived            | 30,512       | 13,711 (44.9%)                | 7,001 (22.9%)  | 3,881 (12.7%)  | 2,457 (8.1%)  | 3,462 (11.3%)  |
